# Supplementary material for: Alternative splicing of ACE2 possibly generates variants that may limit the entry of SARS-CoV-2: a potential therapeutic approach using SSOs
Source: Oxford University Press journal article supplement (doi:10.1042/cs20200419), 2020-05-01
Supplement: cs-2020-0419_supp.pdf [file cs-2020-0419_supp.pdf]

## Supplementary Figure S1.

|           |                                                               |     |             |                                                               |     |
|-----------|---------------------------------------------------------------|-----|-------------|---------------------------------------------------------------|-----|
| N3-E4--E9 | -----                                                         | 0   | N3-E4--E9   | HAYVRAKLMNAYPSVISPIGCLPAHLLGDMWGRFWTNLYSLTPVFGQKPNIDVTDAMVDQ  | 165 |
| N1-E4--E9 | -----                                                         | 0   | N1-E4--E9   | HAYVRAKLMNAYPSVISPIGCLPAHLLGDMWGRFWTNLYSLTPVFGQKPNIDVTDAMVDQ  | 170 |
| E1--E9    | MSSSSHLILLSLVAVTAAQSTIEEQAKTFLDKFNHEAEDLFYQSSLASNNVNTNITEENVQ | 60  | E1--E9      | HAYVRAKLMNAYPSVISPIGCLPAHLLGDMWGRFWTNLYSLTPVFGQKPNIDVTDAMVDQ  | 300 |
| N2-E4--E9 | -----                                                         | 0   | N2-E4--E9   | HAYVRAKLMNAYPSVISPIGCLPAHLLGDMWGRFWTNLYSLTPVFGQKPNIDVTDAMVDQ  | 159 |
| N4-E6-E9  | -----                                                         | 0   | N4-E6-E9    | HAYVRAKLMNAYPSVISPIGCLPAHLLGDMWGRFWTNLYSLTPVFGQKPNIDVTDAMVDQ  | 80  |
| N5-E9     | -----                                                         | 0   | N5-E9       | -----                                                         | 0   |
|           |                                                               |     | ↓ E9        |                                                               |     |
| N3-E4--E9 | -----                                                         | 0   | N3-E4--E9   | AWDAQRIKKEAEKFFVSVGLPNMTQGFWENSLTDPGNVQKAVCHPTAWDLGKGFRIILM   | 225 |
| N1-E4--E9 | -----                                                         | 0   | N1-E4--E9   | AWDAQRIKKEAEKFFVSVGLPNMTQGFWENSLTDPGNVQKAVCHPTAWDLGKGFRIILM   | 230 |
| E1--E9    | NMNNAGDKWSAFLKEQSTLAQMYPLQEIQNLTVKLQLQALQQNGSSVLSSEDKSKRLNTIL | 120 | E1--E9      | AWDAQRIKKEAEKFFVSVGLPNMTQGFWENSLTDPGNVQKAVCHPTAWDLGKGFRIILM   | 360 |
| N2-E4--E9 | -----                                                         | 0   | N2-E4--E9   | AWDAQRIKKEAEKFFVSVGLPNMTQGFWENSLTDPGNVQKAVCHPTAWDLGKGFRIILM   | 219 |
| N4-E6-E9  | -----                                                         | 0   | N4-E6-E9    | AWDAQRIKKEAEKFFVSVGLPNMTQGFWENSLTDPGNVQKAVCHPTAWDLGKGFRIILM   | 140 |
| N5-E9     | -----                                                         | 0   | N5-E9       | -----MREAGMDKG---GRILM                                        | 14  |
|           |                                                               |     | : : * * * * |                                                               |     |
|           |                                                               |     | ↓ E4        |                                                               |     |
| N3-E4--E9 | -----MPLNTHHEHLHTGLNEIMANSLDYNERLWAWESWRSEVGKQLRPLY           | 45  | N3-E4--E9   | CTKVTMDDFLTAHHHEMGHIQYDMAYAAQPFLLRNGANEGFHEAVGEINSLSAATPKHLKS | 285 |
| N1-E4--E9 | -----MEFHHVGRAGLELPTSGLINEIMANSLDYNERLWAWESWRSEVGKQLRPLY      | 50  | N1-E4--E9   | CTKVTMDDFLTAHHHEMGHIQYDMAYAAQPFLLRNGANEGFHEAVGEINSLSAATPKHLKS | 290 |
| E1--E9    | NTMSTIYSTGKVCNPNPQCCLLLEPGLNEIMANSLDYNERLWAWESWRSEVGKQLRPLY   | 180 | E1--E9      | CTKVTMDDFLTAHHHEMGHIQYDMAYAAQPFLLRNGANEGFHEAVGEINSLSAATPKHLKS | 420 |
| N2-E4--E9 | -----MRVPPGLNEIMANSLDYNERLWAWESWRSEVGKQLRPLY                  | 39  | N2-E4--E9   | CTKVTMDDFLTAHHHEMGHIQYDMAYAAQPFLLRNGANEGFHEAVGEINSLSAATPKHLKS | 279 |
| N4-E6-E9  | -----                                                         | 0   | N4-E6-E9    | CTKVTMDDFLTAHHHEMGHIQYDMAYAAQPFLLRNGANEGFHEAVGEINSLSAATPKHLKS | 200 |
| N5-E9     | -----                                                         | 0   | N5-E9       | CTKVTMDDFLTAHHHEMGHIQYDMAYAAQPFLLRNGANEGFHEAVGEINSLSAATPKHLKS | 74  |
|           |                                                               |     | *****       |                                                               |     |
|           |                                                               |     | ↓ E6        |                                                               |     |
| N3-E4--E9 | EEYVVLKNEMARANHYEDYDYMGRGDYEVNGVDGYDSRGQLIEDVEHTFEEIKPLYEHL   | 105 | N3-E4--E9   | IGLLSPDFQEDN                                                  | 297 |
| N1-E4--E9 | EEYVVLKNEMARANHYEDYDYMGRGDYEVNGVDGYDSRGQLIEDVEHTFEEIKPLYEHL   | 110 | N1-E4--E9   | IGLLSPDFQEDN                                                  | 302 |
| E1--E9    | EEYVVLKNEMARANHYEDYDYMGRGDYEVNGVDGYDSRGQLIEDVEHTFEEIKPLYEHL   | 240 | E1--E9      | IGLLSPDFQEDN                                                  | 432 |
| N2-E4--E9 | EEYVVLKNEMARANHYEDYDYMGRGDYEVNGVDGYDSRGQLIEDVEHTFEEIKPLYEHL   | 99  | N2-E4--E9   | IGLLSPDFQEDN                                                  | 291 |
| N4-E6-E9  | -----MPLYVNLQTSIDIKPLYEHL                                     | 20  | N4-E6-E9    | IGLLSPDFQEDN                                                  | 212 |
| N5-E9     | -----                                                         | 0   | N5-E9       | IGLLSPDFQEDN                                                  | 86  |
|           |                                                               |     | *****       |                                                               |     |

**Figure S1.** Alignment of the N-terminal amino acid sequences conceptually encoded by predicted exons. The nucleotide sequences were translated using the ExPaSy translate tool, and alignment was done using Clustal Omega.

## Supplementary Figure S2.

|                                              |                                                               |     |             |                                                             |     |
|----------------------------------------------|---------------------------------------------------------------|-----|-------------|-------------------------------------------------------------|-----|
| E11--13-N7                                   | REIVGVVEPVPHDETYCDPASLFHVSNDYSFIRYYTRTLVQFQEQALCQAAKHEGPLHK   | 60  | E11--13-N7  | -----                                                       | 159 |
| E11--E14-N6                                  | REIVGVVEPVPHDETYCDPASLFHVSNDYSFIRYYTRTLVQFQEQALCQAAKHEGPLHK   | 60  | E11--E14-N6 | ----NPRTEQDLSPVIKLMDLPFSSKPF-----LKVSHETKNQCKKTHSDT         | 214 |
| E11--E18                                     | REIVGVVEPVPHDETYCDPASLFHVSNDYSFIRYYTRTLVQFQEQALCQAAKHEGPLHK   | 60  | E11--E18    | MILFGEDVRVANLKPRISFNFFVTAPKNVSDIIPRTEVEKAIRMSRSRINDAFRLNDNS | 240 |
| E11--E14-N8                                  | REIVGVVEPVPHDETYCDPASLFHVSNDYSFIRYYTRTLVQFQEQALCQAAKHEGPLHK   | 60  | E11--E14-N8 | -----                                                       | 161 |
| *****                                        |                                                               |     |             |                                                             |     |
| E11--13-N7                                   | CDISNSTEAGQKLFNMLRLGKSEPWTLALENVVGAKNMNVRPLLNYFEPLFTWLKDQNK   | 120 | E11--13-N7  | -----                                                       | 159 |
| E11--E14-N6                                  | CDISNSTEAGQKLFNMLRLGKSEPWTLALENVVGAKNMNVRPLLNYFEPLFTWLKDQNK   | 120 | E11--E14-N6 | TTTKS                                                       | 219 |
| E11--E18                                     | CDISNSTEAGQKLFNMLRLGKSEPWTLALENVVGAKNMNVRPLLNYFEPLFTWLKDQNK   | 120 | E11--E18    | LEFLGIQPTLGPPNQPPVSIWLIVFGVMGVIVGIVILIFTGIRDRKKKNKARSGENPY  | 300 |
| E11--E14-N8                                  | CDISNSTEAGQKLFNMLRLGKSEPWTLALENVVGAKNMNVRPLLNYFEPLFTWLKDQNK   | 120 | E11--E14-N8 | -----                                                       | 161 |
| *****                                        |                                                               |     |             |                                                             |     |
| E11--13-N7                                   | SFVGWSTDWSPCKSAMARPRLTATSV-----SWVQAILLPQSPE-----             | 159 | E11--13-N7  | -----                                                       | 159 |
| E11--E14-N6                                  | SFVGWSTDWSPYADQSIKVRISLKSALGDKAANSTLGKKLAD-SHL-ERLR-----AE--  | 171 | E11--E14-N6 | -----                                                       | 219 |
| E11--E18                                     | SFVGWSTDWSPYADQSIKVRISLKSALGDKAYEWNDNEMYLFRRSSVAYAMRQYFLKVKNQ | 180 | E11--E18    | ASIDISKGENNPGFQNTDDVQTSF                                    | 324 |
| E11--E14-N8                                  | SFVGWSTDWSPYADQSIKVRISLKSALGDKAGPVNGIPALL-----                | 161 | E11--E14-N8 | -----                                                       | 161 |
| *****                                        |                                                               |     |             |                                                             |     |
| <div> <div>E13↑</div> <div>E14↑</div> </div> |                                                               |     |             |                                                             |     |

**Figure S2.** Alignment of C-terminal amino acid sequences encoded by predicted exons. The nucleotide sequences were translated using the ExPaSy translate tool, and alignment was done using Clustal Omega.
